# Supplementary material for: Dysregulation of M segment gene expression contributes to influenza A virus host restriction
Source: PubMed Central journal article supplement (PMC6695095; doi:10.1371/journal.ppat.1007892), 2019-08-15
Supplement: ppat.1007892.s001.pdf [file ppat.1007892.s001.pdf]

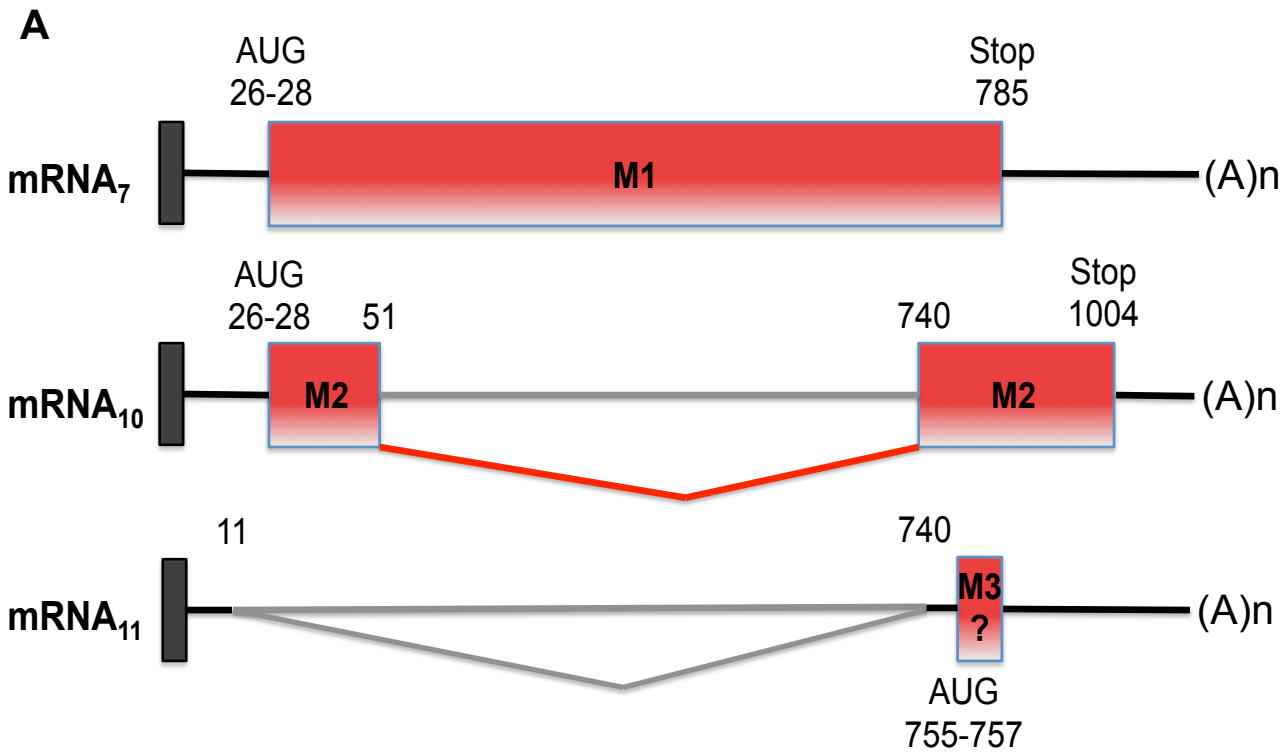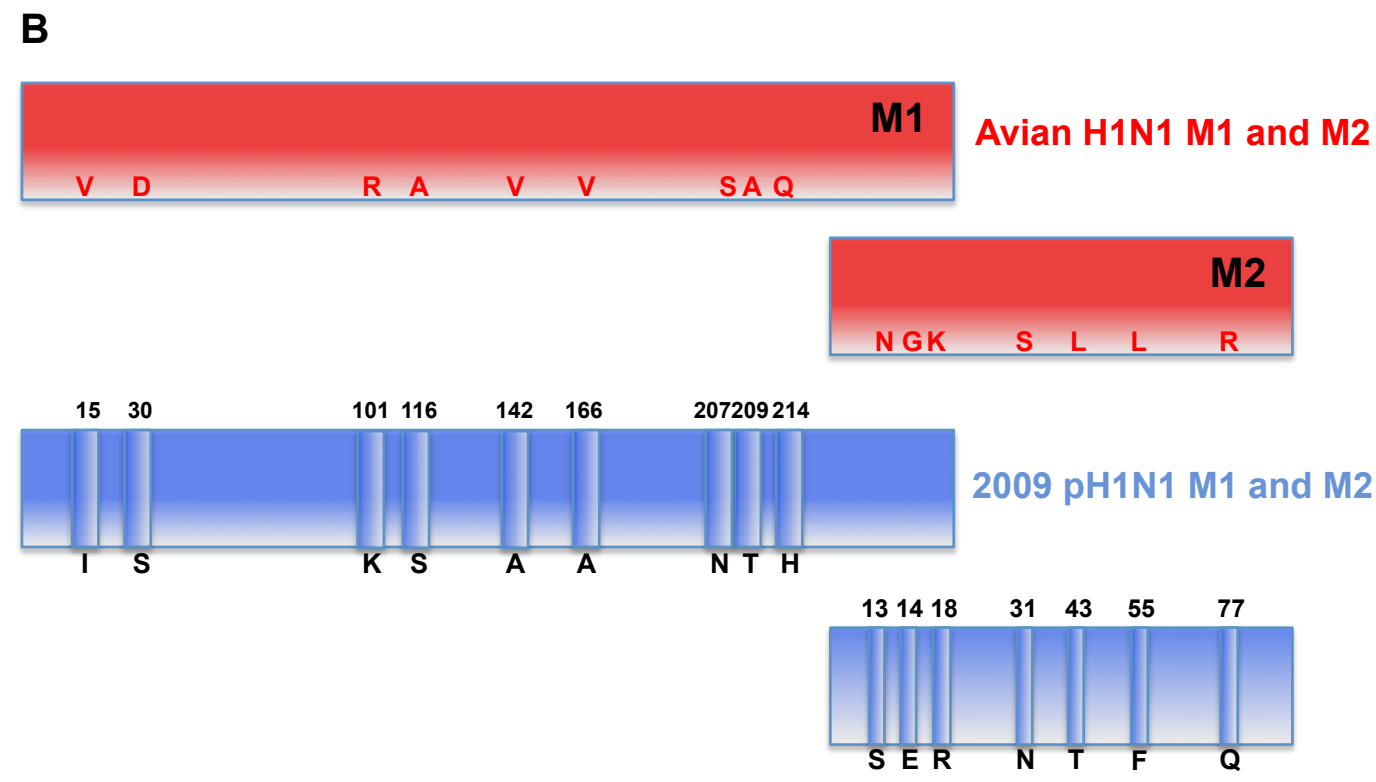

**C**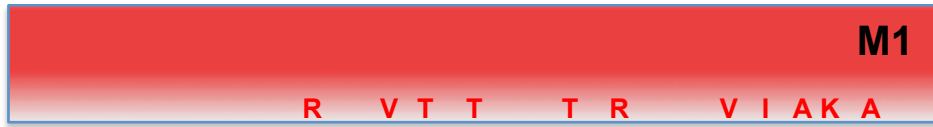

Avian H1N1 M1 and M2

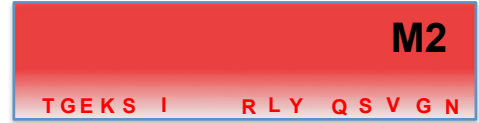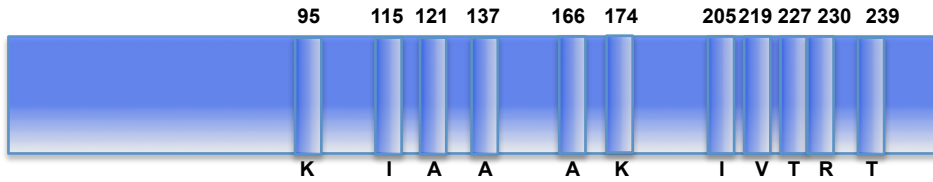

Panama/99 M1 and M2

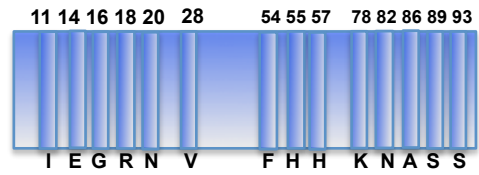**D**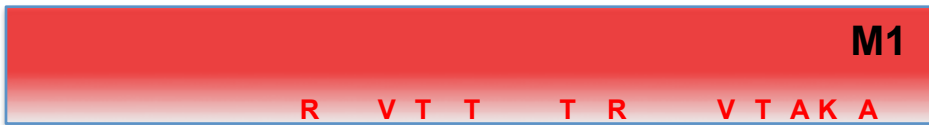

Avian H1N1 M1 and M2

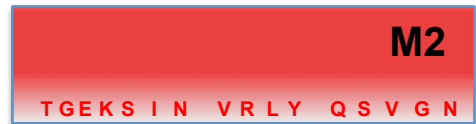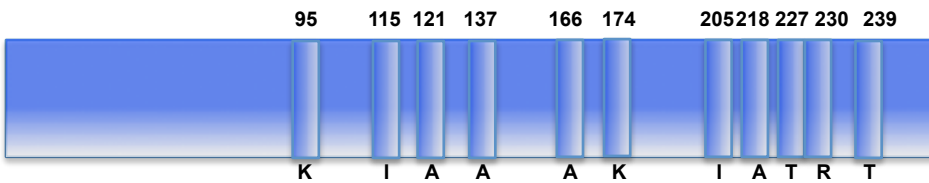

Bethesda/15 M1 and M2

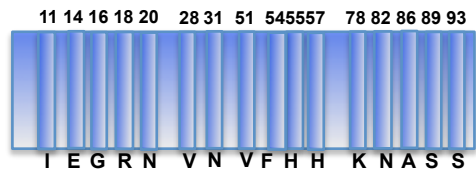

## Supplementary Figure 1. Schematic of M segment mRNAs and gene products

**A.** The M segment of influenza virus is template for synthesis of mRNA<sub>7</sub> (encoding M1), mRNA M<sub>10</sub> (encoding M2), and mRNA<sub>11</sub> (which encodes a putative but unconfirmed 10 amino acid peptide from a short open reading frame). **B.** Pandemic H1N1 influenza virus M1 and M2 proteins differ from the avian consensus sequences by 9 residues in M1 and 7 residues in M2. The M segments differ by 8.3% at the nucleotide level. **C.** Seasonal H3N2 influenza virus strain A/Panama/2007/99 M1 and M2 proteins differ from the avian consensus sequences by 11 residues in M1 and 14 residues in M2. The M segments differ by 9% at the nucleotide level. **D.** Seasonal H3N2 influenza virus strain A/Bethesda/55/15 M1 and M2 proteins differ from the avian consensus sequences by 11 residues in M1 and 16 residues in M2. The M segments differ by 9.5% at the nucleotide level.
