# Supplementary material for: Dysregulation of M segment gene expression contributes to influenza A virus host restriction
Source: PubMed Central journal article supplement (PMC6695095; doi:10.1371/journal.ppat.1007892), 2019-08-15
Supplement: ppat.1007892.s003.pdf [file ppat.1007892.s003.pdf]

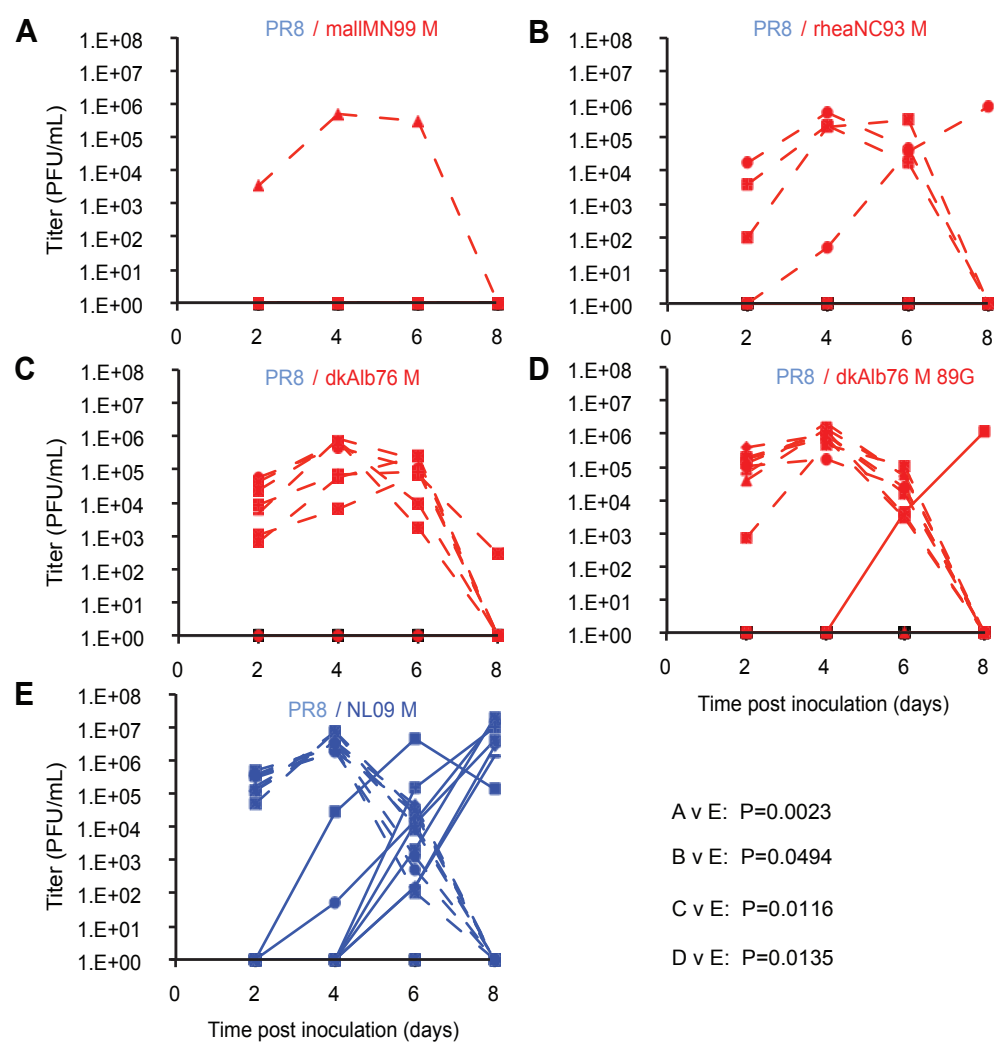

### Supplementary Figure 3. pH1N1 Influenza Virus M Segment Increases Kinetics of Replication of PR8-Based Viruses among Guinea Pigs.

Groups of four guinea pigs were inoculated with 10 PFU of each avian M-encoding virus, or NL09 M-encoding virus, as indicated. Graphs show individual titers obtained from animals used in three independent experiments. (A-E) Virus replication in nasal wash of inoculated animals was measured by plaque titration at days 2, 4, 6, and 8 post-infection and the titers at each time point were plotted (dotted lines). The differences between PR8 NL09 M and each avian M-encoding virus were considered significant. Statistical significance in kinetics of growth was determined by assessing the interaction of time and virus using repeated measures, two way, multiple comparisons ANOVA on mean values, with Bonferroni correction applied to account for comparison of a limited no of means.
