# Supplementary material for: Dysregulation of M segment gene expression contributes to influenza A virus host restriction
Source: PubMed Central journal article supplement (PMC6695095; doi:10.1371/journal.ppat.1007892), 2019-08-15

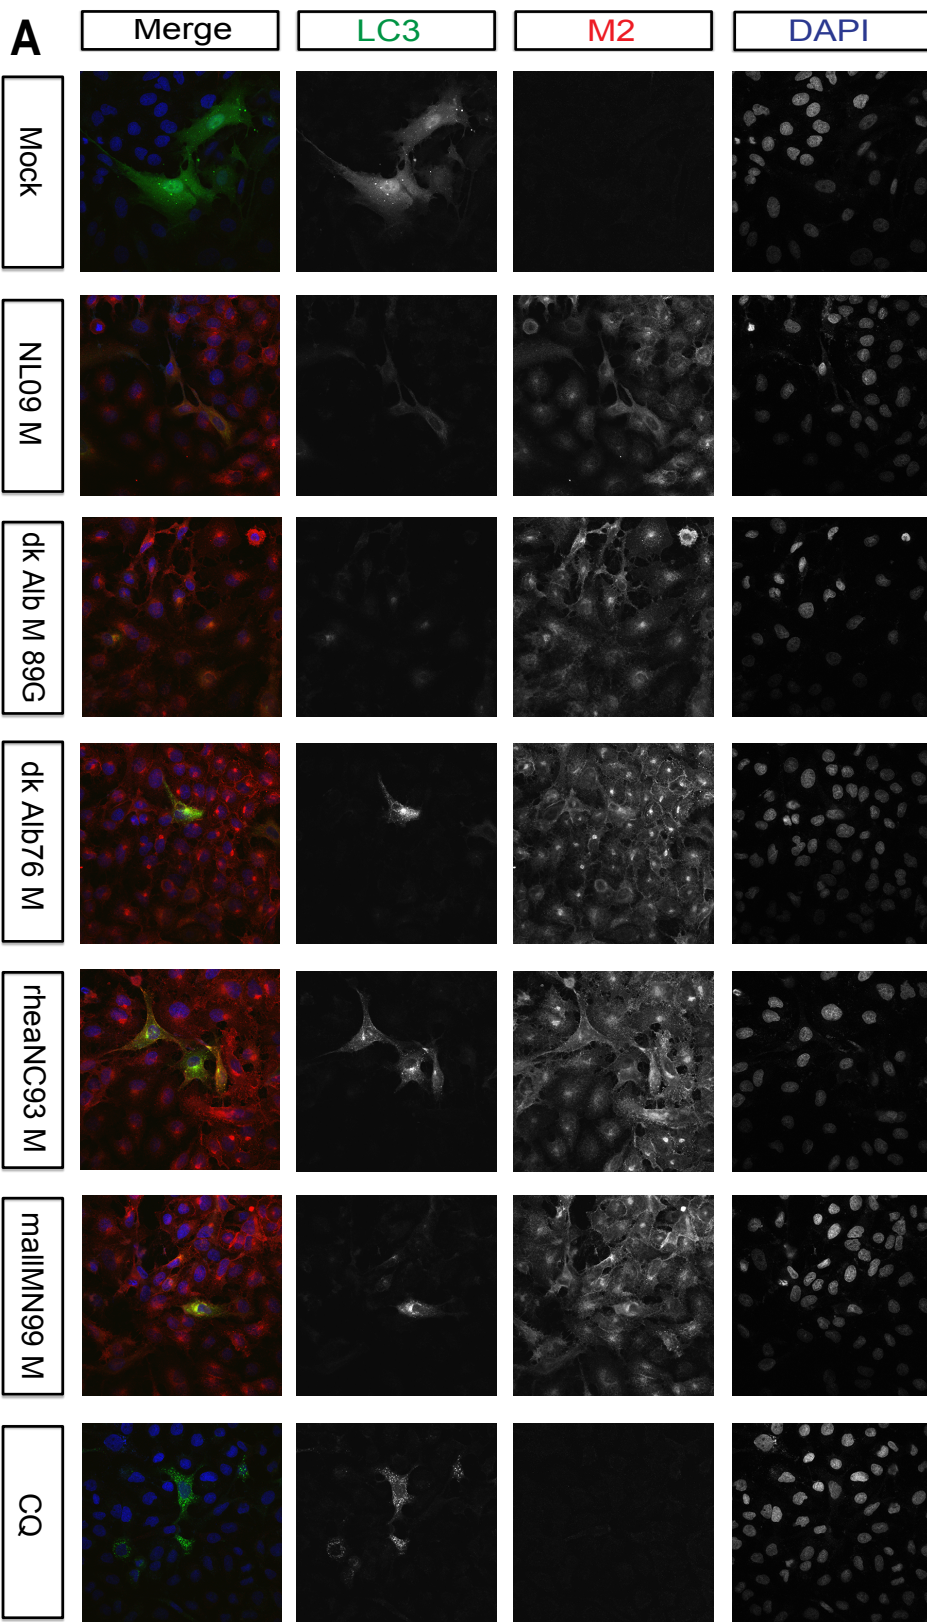

**Supplementary Figure 7. Visualization of LC3 and M2 co-localization by immunofluorescence microscopy.**

A549 cells were transduced with GFP-LC3 protein and inoculated 24 h later with the indicated IAVs, encoding avian or human derived M segments, at an MOI of 5 PFU/cell. Cells were fixed 8 h later and stained with anti-M2 (Mab E10; red) and DAPI (blue) followed by imaging with confocal microscopy. Examples of optical sections are shown, either as merged 3-color images or the red, green, and blue channels alone (in grey scale). **(A)** 63x magnification. **(B)** 3x magnification of the same images shown in **A**. Brightness was adjusted for optimal clarity, with all images treated equally.

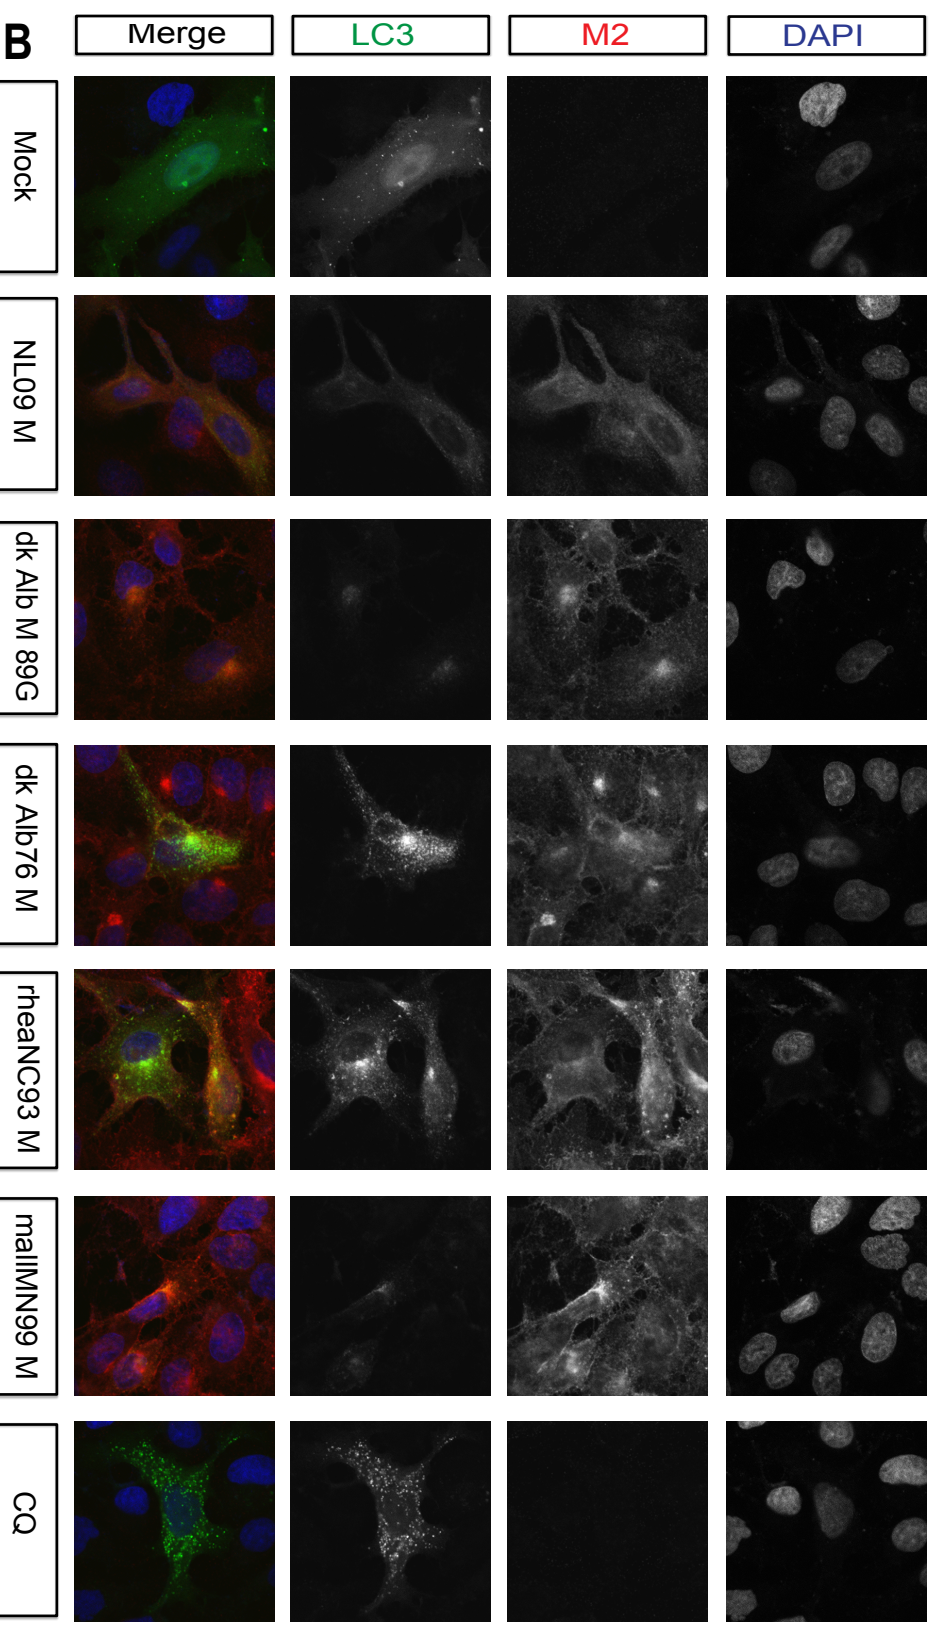

Supplement: ppat.1007892.s007.pdf [file ppat.1007892.s007.pdf]
